# Supplementary material for: Functional, cognitive and physical outcomes 3 years after minor lacunar or cortical ischaemic stroke
Source: PubMed Central journal article supplement (PMC6581154; doi:10.1136/jnnp-2018-319134), 2018-12-15
Supplement: jnnp-2018-319134supp001.pdf [file jnnp-2018-319134supp001.pdf]

## Supplemental Data

Table 1. Frequencies at 3year follow-up

| <b>Variable</b>            | <b>N</b> | <b>Descriptive</b> |
|----------------------------|----------|--------------------|
| <b>Vascular outcomes</b>   |          |                    |
| Vascular risk factors      |          |                    |
| Hypertension               | 198      | 12(6.06)           |
| Hyperlipidaemia            | 197      | 52 (26.40)         |
| Diabetes                   | 195      | 15 (7.69)          |
| Atrial fibrillation        | 195      | 22 (11.28)         |
| <b>Disability</b>          |          |                    |
| mRS <sup>a</sup> n(%)      | 156      |                    |
| No Symptoms                |          | 61 (39.10)         |
| No significant disability  |          | 59 (37.82)         |
| Slight disability          |          | 17 (10.90)         |
| Moderate disability        |          | 18 (11.54)         |
| Moderate/severe disability |          | 1 (0.64)           |
| Severe disability          |          | 0                  |
| <b>CDR<sup>a</sup></b>     |          |                    |
|                            | 157      |                    |
| No dementia                |          | 74 (47.13)         |
| Very mild dementia         |          | 75 (47.77)         |
| Mild dementia              |          | 8 (5.10)           |
| <b>SIS<sup>bc</sup></b>    |          |                    |
| Strength                   | 165      | 82.27±22.15        |
| Memory                     | 164      | 82.58±18.17        |
| Emotion                    | 155      | 79.91±19.40        |
| Communication              | 165      | 90.34±13.92        |
| ADL                        | 165      | 86.98±18.72        |
| Mobility                   | 165      | 83.77±20.77        |
| Hand function              | 166      | 84.34±23.83        |
| Social                     | 166      | 83.30±24.10        |
| <b>EQ-5<sup>bd</sup></b>   |          |                    |
| Mobility                   | 162      | 1 (1-3)            |
| Self-care                  | 163      | 1 (1-1)            |
| Usual activities           | 163      | 1 (1-2)            |
| Pain/discomfort            | 163      | 1 (1-2)            |
| Anxiety/depression         | 163      | 1 (1-2)            |

Descriptive statistics are either  $\pm$  Mean and SD, n(%) or median (IQR).

<sup>a</sup> Objective/In-person assessment

<sup>b</sup> Subjective/Self-reported

<sup>c</sup> Possible scores ranged from 1-100 which higher scores indicating better functioning.

<sup>d</sup> Possible scores ranged from 1-5 which higher scores indicating better functioning.

mRS = Modified Rank Scale; CDR = Clinical Dementia Rating; SIS = Stroke Impact Scale;  
ADL = Activities of Daily Living; EQ-5 = European Quality of Life Scale
